# Supplementary material for: Genome Features of “Dark-Fly”, a Drosophila Line Reared Long-Term in a Dark Environment
Source: PLOS journal article supplement (doi:10.1371/journal.pone.0033288), 2012-03-14
Supplement: S1 (10.1371/journal.pone.0033288.s001) [file journal.pone.0033288.s001]

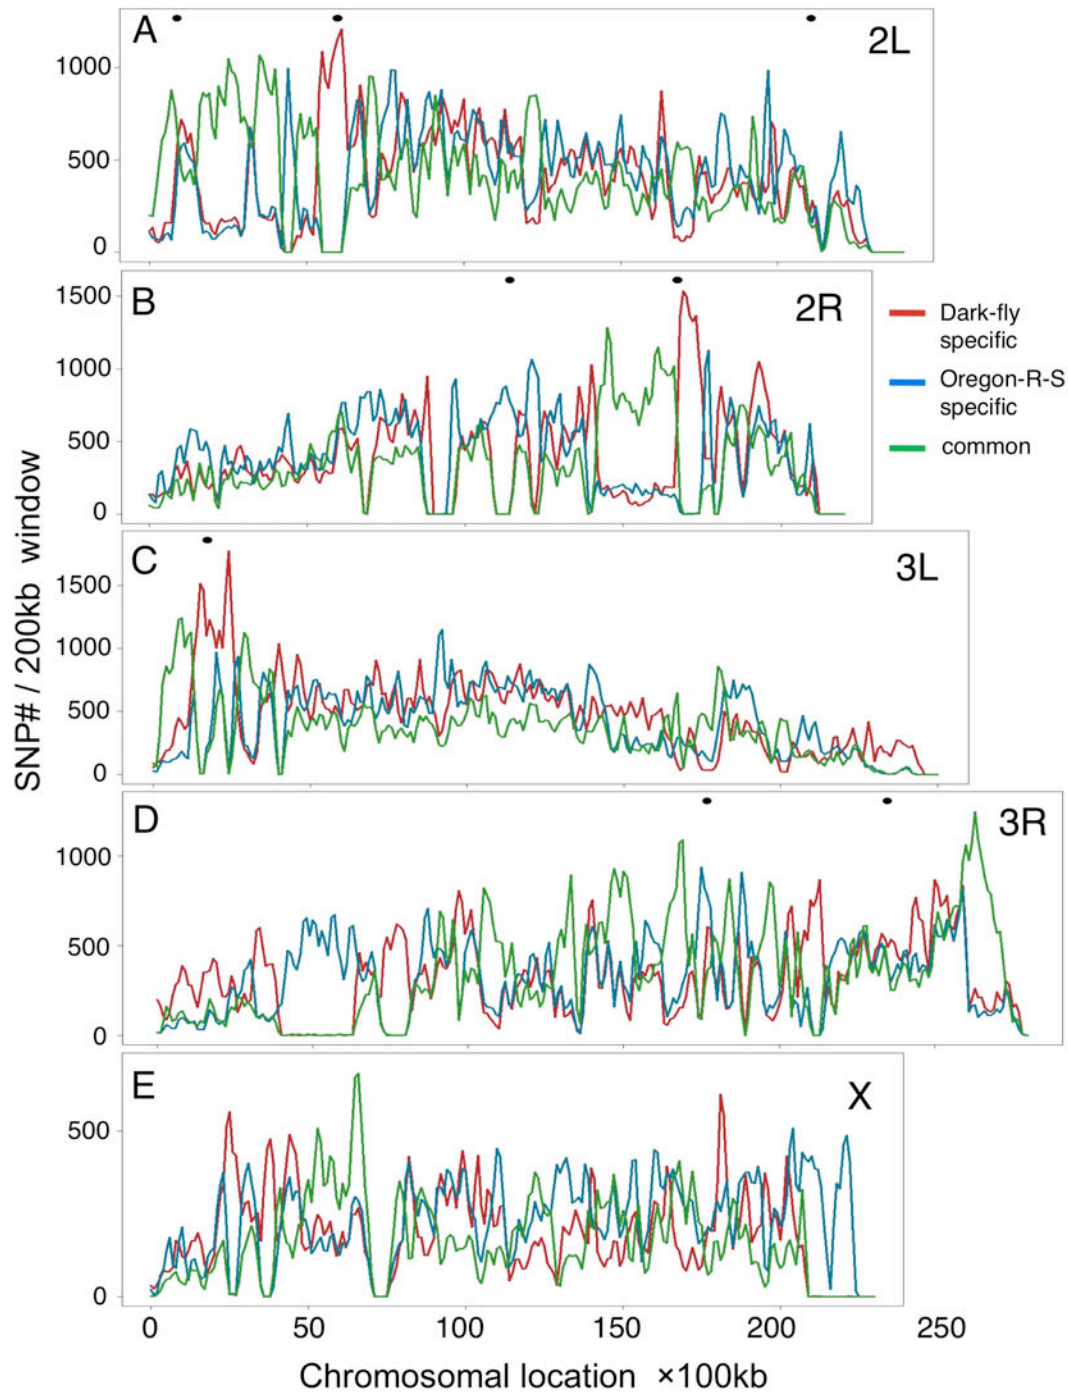

Fig. S1 Distribution of SNPs on chromosomes

Distribution of Dark-fly-specific (red), Oregon-R-S-specific (blue) and common (green) SNPs was analyzed. The number of SNPs in a sliding window (200-kb window at 100-kb steps) was calculated and was plotted versus the locations on 2L (A), 2R (B), 3L (C), 3R (D) and X (E) chromosomes. Location of eight genes used for the phylogenetic analysis (Fig. S2) are indicated by black dots at the top of the graph; *aru* (2L:861849 (start position)), *chic* (2L:5972900), *betaInt-nu* (2L:21052832), *Khc-73* (2R:11403283), *insec* (2R:16708771), *drpr* (3L:1715594), *glec* (3R:17676627), and *tau* (3R:23466512).
