# Supplementary material for: Genome Features of “Dark-Fly”, a Drosophila Line Reared Long-Term in a Dark Environment
Source: PLOS journal article supplement (doi:10.1371/journal.pone.0033288), 2012-03-14
Supplement: S2 (10.1371/journal.pone.0033288.s002) [file journal.pone.0033288.s002]

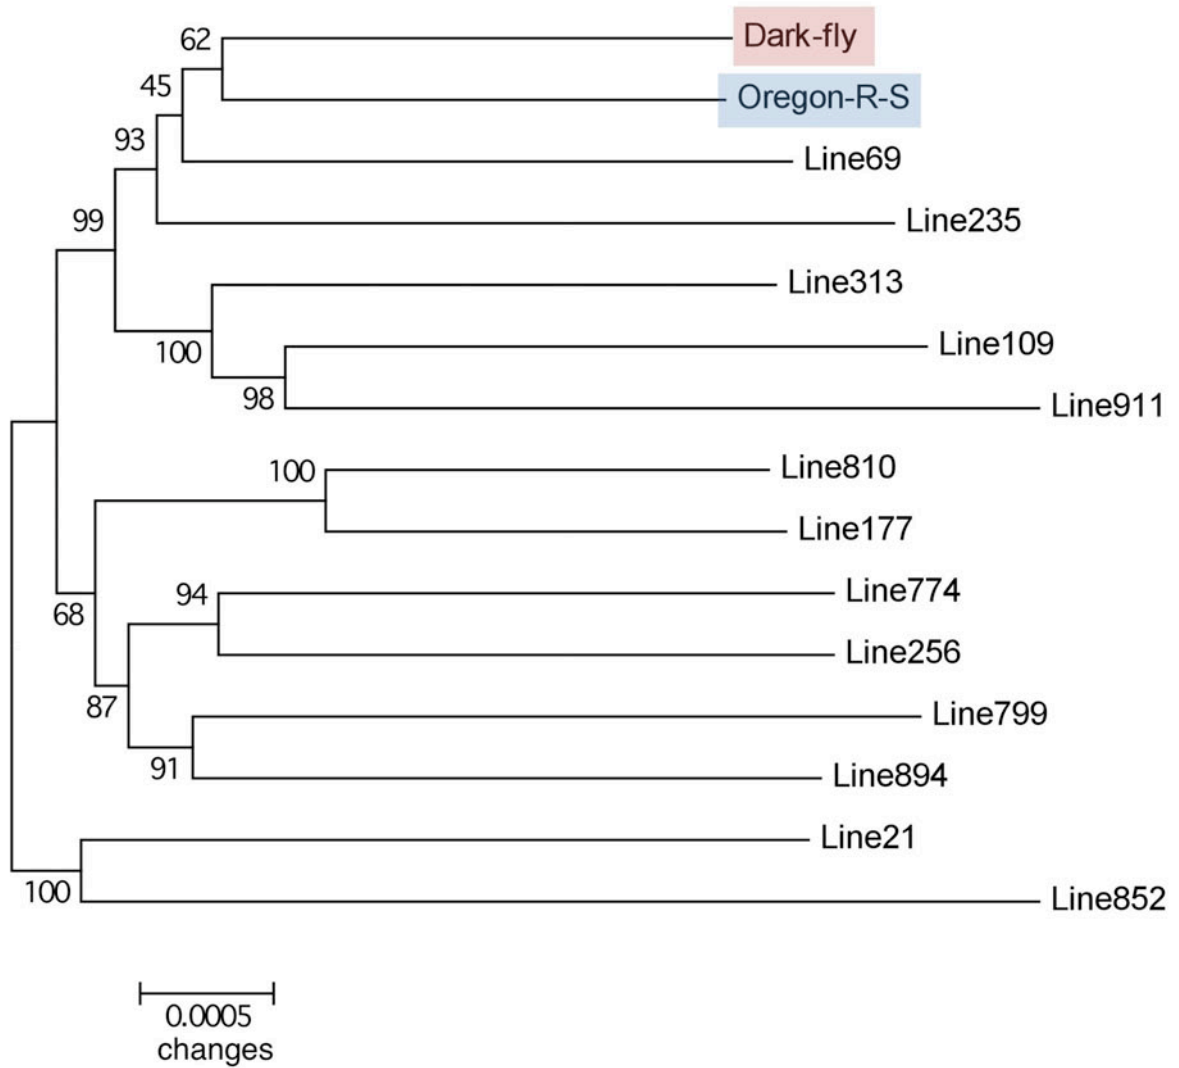

Fig. S2 Phylogenetic tree analysis of the Dark-fly and Oregon-R-S genomes

Neighbor-joining tree with p-distance based on analysis of the combined nucleotide sequence (total 87982 bases) of 8 genes (aru, chic, betaInt-nu, Khc-73, insc, drpr, glec, and tau). The bootstrap value from 500 replications was calculated using MEGA. DGRP lines were randomly selected and are indicated by line number. DGRP lines were highly diverse, whereas Dark-fly (red) and Oregon-R-S (blue) were relatively close on the phylogenetic tree.
