# Supplementary material for: Genome Features of “Dark-Fly”, a Drosophila Line Reared Long-Term in a Dark Environment
Source: PLOS journal article supplement (doi:10.1371/journal.pone.0033288), 2012-03-14
Supplement: S12 (10.1371/journal.pone.0033288.s012) [file journal.pone.0033288.s012]

Table S7 Homozygosity of SNPs in genome

Overall SNPs ( $0.2 \leq$  frequency) were indentified using VarScan program and were classified into homo SNPs ( $0.9 \leq$  frequency) and floating SNPs ( $0.2 \leq$  frequency  $< 0.9$ ). The number of homo SNPs was slightly different from that of the homo SNPs in Table 2 and Table 3, due to the difference of data filtering. Homo SNP fraction and mean SNP frequency (homozygosity) were calculated from the VarScan data. \* indicates significant difference of mean homozygosity between Dark-fly and Oregon-R-S (Welch t-test, p-value = 2.2E-16).

| fly line                                  | Dark-fly          | Oregon-R-S        |
|-------------------------------------------|-------------------|-------------------|
| overall SNPs ( $0.2 \leq$ freq)           | 522,391           | 499,507           |
| homo SNPs ( $0.9 \leq$ freq)              | 463,633           | 445,666           |
| floating SNPs ( $0.2 \leq$ freq $< 0.9$ ) | 58,758            | 53,841            |
| homo SNP fraction (%)                     | 88.8              | 89.2              |
| homozygosity (mean $\pm$ SD) *            | 0.941 $\pm$ 0.176 | 0.944 $\pm$ 0.171 |
