# Supplementary material for: Genome Features of “Dark-Fly”, a Drosophila Line Reared Long-Term in a Dark Environment
Source: PLOS journal article supplement (doi:10.1371/journal.pone.0033288), 2012-03-14
Supplement: S14 (10.1371/journal.pone.0033288.s014) [file journal.pone.0033288.s014]

Table S9 GO families of genes carrying nsSNPs and cInDels in the Dark-fly ROH regions

GO families (MF4) were listed from the data of genes in the Dark-fly ROH regions using the DAVID tool. Descriptions are the same as for Table S1.

| GO Term: Molecular function (MF4)                     | total<br>gene<br># | count# | p-value  | fold<br>enrich-<br>ment |
|-------------------------------------------------------|--------------------|--------|----------|-------------------------|
| GO:0004091~carboxylesterase activity                  | 107                | 10     | 8.89E-05 | 5.36                    |
| GO:0005083~small GTPase regulator activity            | 108                | 7      | 1.08E-02 | 3.72                    |
| GO:0005085~guanyl-nucleotide exchange factor activity | 60                 | 5      | 1.97E-02 | 4.78                    |
